# Supplementary material for: Physical work demands and psychosocial working conditions as predictors of musculoskeletal pain: a cohort study comparing self-reported and job exposure matrix measurements
Source: PubMed Central journal article supplement — Occup Environ Med. 2018 Jul 25;75(10):752–8. doi: 10.1136/oemed-2018-105151 (PMC6166595; doi:10.1136/oemed-2018-105151), 2018-07-25
Supplement: oemed-2018-105151supp001.pdf [file oemed-2018-105151supp001.pdf]

## APPENDIX

**Table A1: Measurements of musculoskeletal pain and exposures**

| Factor                       | Items                                                                                                                      | Response options | Cronbach's $\alpha$ |
|------------------------------|----------------------------------------------------------------------------------------------------------------------------|------------------|---------------------|
| <b>Musculoskeletal pain</b>  | During the past 3 months have you had pain in..                                                                            |                  |                     |
|                              | The hips                                                                                                                   | Yes/No           |                     |
|                              | The knees                                                                                                                  | Yes/No           |                     |
|                              | The arms and/or wrists                                                                                                     | Yes/No           |                     |
|                              | The neck and/or shoulders                                                                                                  | Yes/No           |                     |
|                              | The lower back                                                                                                             | Yes/No           |                     |
| <b>Physical work demands</b> | Do you sit?                                                                                                                | A                | 0.89                |
|                              | Do you walk or stand?                                                                                                      | A                |                     |
|                              | Do you work with your back twisted or bent forwards without supporting with your hands and arms?                           | A                |                     |
|                              | Are your arms lifted to or above the shoulders?                                                                            | A                |                     |
|                              | Do you make the same arm-movements many times a minute (e.g. packing, mounting, machinework, carving)?                     | A                |                     |
|                              | Do you squat or kneel when working?                                                                                        | A                |                     |
|                              | Do you push or pull?                                                                                                       | A                |                     |
|                              | Do you carry or lift?                                                                                                      | A                |                     |
| <b>Quantitative demands</b>  | Do you have time enough for your work tasks?                                                                               | B                | 0.75                |
|                              | Do you have deadlines that are difficult to keep?                                                                          | B                |                     |
|                              | Do you get unexpected work tasks that put you under time pressure?                                                         | B                |                     |
|                              | Are you available outside normal working hours?                                                                            | B                |                     |
|                              | Do you have to work overtime?                                                                                              | B                |                     |
| <b>Emotional demands</b>     | Do you get emotionally involved in your work?                                                                              | B                | 0.58                |
|                              | Do you have to deal with the problems of e.g. clients, patients or students in your work (not problems of your colleagues) | B                |                     |
| <b>Decision authority</b>    | Can you influence how you solve your work tasks?                                                                           | B                | 0.77                |
|                              | Can you influence when you solve your work tasks?                                                                          | B                |                     |
| <b>Job insecurity</b>        | Are you worried about becoming unemployed?                                                                                 | C                |                     |
| <b>Violence</b>              | Have you within the past 12 months been exposed to physical violence at your workplace?                                    | D                |                     |

A: Almost all of the time, About  $\frac{3}{4}$  of the time, About  $\frac{1}{2}$  of the time, About  $\frac{1}{4}$  of the time, Rarely, Never. B: Always, Often, Sometimes, Seldomly, Never. C: To a very high, extent, To a high extent, To some extent, To a low extent, To a very low extent. D: Yes, daily, Yes, weekly, Yes, monthly, Yes, less frequently, No, never

**Table A2. Overview of occupational groups in the population (3-digit DISCO groups)**

| <b>Job group</b>                                                  | <b>N Participants</b> |
|-------------------------------------------------------------------|-----------------------|
| 011 Commissioned Armed Forces Officers                            | 24                    |
| 021 Non-Commissioned Armed Forces Officers                        | 17                    |
| 031 Armed Forces Occupations, Other Ranks                         | 19                    |
| 111 Legislators And Senior Officials                              | 13                    |
| 112 Managing Directors And Chief Executives                       | 73                    |
| 121 Business Services And Administration Managers                 | 94                    |
| 122 Sales, Marketing And Development Managers                     | 57                    |
| 132 Manufacturing, Mining, Construction And Distribution Managers | 32                    |
| 133 Information And Communications Technology Services Managers   | 14                    |
| 134 Professional Services Managers                                | 103                   |
| 142 Retail And Wholesale Trade Managers                           | 16                    |
| 200 Professionals                                                 | 57                    |
| 213 Life Science Professionals                                    | 29                    |
| 214 Engineering Professionals (Excluding Electrotechnology)       | 199                   |
| 215 Electrotechnology Engineers                                   | 32                    |
| 216 Architects, Planners, Surveyors And Designers                 | 34                    |
| 220 Health Professionals                                          | 10                    |
| 221 Medical Doctors                                               | 67                    |
| 222 Nursing And Midwifery Professionals                           | 239                   |
| 226 Other Health Professionals                                    | 148                   |
| 230 Teaching Professionals                                        | 7                     |
| 231 University And Higher Education Teachers                      | 124                   |
| 232 Vocational Education Teachers                                 | 77                    |
| 233 Secondary Education Teachers                                  | 100                   |
| 234 Primary School And Early Childhood Teachers                   | 724                   |
| 235 Other Teaching Professionals                                  | 241                   |
| 241 Finance Professionals                                         | 175                   |
| 242 Administration Professionals                                  | 76                    |
| 243 Sales, Marketing And Public Relations Professionals           | 48                    |
| 251 Software And Applications Developers And Analysts             | 181                   |
| 252 Database And Network Professionals                            | 29                    |
| 260 Legal, Social And Cultural Professionals                      | 42                    |
| 261 Legal Professionals                                           | 55                    |
| 262 Librarians, Archivists And Curators                           | 38                    |
| 263 Social And Religious Professionals                            | 123                   |
| 264 Authors, Journalists And Linguists                            | 41                    |
| 265 Creative And Performing Artists                               | 17                    |
| 300 Technicians And Associate Professionals                       | 11                    |
| 311 Physical And Engineering Science Technicians                  | 224                   |
| 313 Process Control Technicians                                   | 6                     |
| 314 Life Science Technicians And Related Associate Professionals  | 7                     |
| 315 Ship And Aircraft Controllers And Technicians                 | 21                    |
| 321 Medical And Pharmaceutical Technicians                        | 66                    |
| 325 Other Health Associate Professionals                          | 39                    |
| 330 Business And Administration Associate Professionals           | 33                    |
| 331 Financial And Mathematical Associate Professionals            | 138                   |
| 332 Sales And Purchasing Agents And Brokers                       | 157                   |
| 333 Business Services Agents                                      | 47                    |
| 334 Administrative And Specialized Secretaries                    | 229                   |

|                                                                                       |     |
|---------------------------------------------------------------------------------------|-----|
| 335 Government Regulatory Associate Professionals                                     | 62  |
| 341 Legal, Social And Religious Associate Professionals                               | 41  |
| 343 Artistic, Cultural And Culinary Associate Professionals                           | 19  |
| 351 Information And Communications Technology Operations And User Support Technicians | 35  |
| 352 Telecommunications And Broadcasting Technicians                                   | 24  |
| 400 Clerical Support Workers                                                          | 75  |
| 411 General Office Clerks                                                             | 298 |
| 412 Secretaries (General)                                                             | 42  |
| 413 Keyboard Operators                                                                | 26  |
| 421 Tellers, Money Collectors And Related Clerks                                      | 9   |
| 422 Client Information Workers                                                        | 43  |
| 431 Numerical Clerks                                                                  | 79  |
| 432 Material Recording And Transport Clerks                                           | 60  |
| 441 Other Clerical Support Workers                                                    | 114 |
| 511 Travel Attendants, Conductors And Guides                                          | 21  |
| 512 Cooks                                                                             | 14  |
| 513 Waiters And Bartenders                                                            | 12  |
| 514 Hairdressers, Beauticians And Related Workers                                     | 14  |
| 515 Building And Housekeeping Supervisors                                             | 83  |
| 516 Other Personal Services Workers                                                   | 11  |
| 522 Shop Salespersons                                                                 | 161 |
| 523 Cashiers And Ticket Clerks                                                        | 28  |
| 524 Other Sales Workers                                                               | 66  |
| 531 Child Care Workers And Teachers' Aides                                            | 201 |
| 532 Personal Care Workers In Health Services                                          | 396 |
| 541 Protective Services Workers                                                       | 70  |
| 611 Market Gardeners And Crop Growers                                                 | 21  |
| 700 Craft And Related Trades Workers                                                  | 27  |
| 710 Building And Related Trades Workers (Excluding Electricians)                      | 11  |
| 711 Building Frame And Related Trades Workers                                         | 88  |
| 712 Building Finishers And Related Trades Workers                                     | 45  |
| 713 Painters, Building Structure Cleaners And Related Trades Workers                  | 15  |
| 721 Sheet And Structural Metal Workers, Moulders And Welders, And Related Workers     | 30  |
| 722 Blacksmiths, Toolmakers And Related Trades Workers                                | 86  |
| 723 Machinery Mechanics And Repairers                                                 | 69  |
| 732 Printing Trades Workers                                                           | 18  |
| 741 Electrical Equipment Installers And Repairers                                     | 70  |
| 742 Electronics And Telecommunications Installers And Repairers                       | 4   |
| 751 Food Processing And Related Trades Workers                                        | 29  |
| 752 Wood Treaters, Cabinet-Makers And Related Trades Workers                          | 7   |
| 754 Other Craft And Related Workers                                                   | 10  |
| 811 Mining And Mineral Processing Plant Operators                                     | 3   |
| 812 Metal Processing And Finishing Plant Operators                                    | 15  |
| 813 Chemical And Photographic Products Plant And Machine Operators                    | 7   |
| 814 Rubber, Plastic And Paper Products Machine Operators                              | 27  |
| 815 Textile, Fur And Leather Products Machine Operators                               | 4   |
| 816 Food And Related Products Machine Operators                                       | 39  |
| 817 Wood Processing And Papermaking Plant Operators                                   | 10  |
| 818 Other Stationary Plant And Machine Operators                                      | 29  |
| 821 Assemblers                                                                        | 57  |
| 831 Locomotive Engine Drivers And Related Workers                                     | 9   |
| 832 Car, Van And Motorcycle Drivers                                                   | 5   |

|                                                              |     |
|--------------------------------------------------------------|-----|
| 833 Heavy Truck And Bus Drivers                              | 93  |
| 834 Mobile Plant Operators                                   | 19  |
| 900 Elementary Occupations                                   | 6   |
| 911 Domestic, Hotel And Office Cleaners And Helpers          | 150 |
| 912 Vehicle, Window, Laundry And Other Hand Cleaning Workers | 6   |
| 931 Mining And Construction Labourers                        | 93  |
| 932 Manufacturing Labourers                                  | 47  |
| 933 Transport And Storage Labourers                          | 65  |
| 941 Food Preparation Assistants                              | 39  |
| 961 Refuse Workers                                           | 3   |
| 962 Other Elementary Workers                                 | 12  |
| 999 Job Group Not Registered                                 | 507 |

**Table A3. Descriptives for continuous exposure measurements**

|                              | INDIVIDUAL LEVEL MEASUREMENT |      |       | JOB EXPOSURE MATRIX |      |            | Intraclass coefficient (ICC) |
|------------------------------|------------------------------|------|-------|---------------------|------|------------|------------------------------|
|                              | Mean                         | SD   | Range | Mean                | SD   | Range      |                              |
| <b>Physical work demands</b> |                              |      |       |                     |      |            |                              |
| Men                          | 19.03                        | 7.65 | 8-48  | 19.09               | 5.38 | 9.78-34.96 | 0.52                         |
| Women                        | 18.11                        | 6.95 | 8-48  | 18.10               | 5.08 | 9.89-32.87 | 0.52                         |
| <b>Quantitative demands</b>  |                              |      |       |                     |      |            |                              |
| Men                          | 3.06                         | 0.69 | 1-5   | 3.06                | 0.20 | 2.44-3.72  | 0.10                         |
| Women                        | 2.90                         | 0.70 | 1-5   | 2.90                | 0.23 | 1.96-3.55  | 0.14                         |
| <b>Emotional demands</b>     |                              |      |       |                     |      |            |                              |
| Men                          | 2.75                         | 1.03 | 1-5   | 2.75                | 0.45 | 1.77-4.00  | 0.21                         |
| Women                        | 3.24                         | 1.04 | 1-5   | 3.24                | 0.62 | 1.76-4.28  | 0.36                         |
| <b>Decision authority</b>    |                              |      |       |                     |      |            |                              |
| Men                          | 4.18                         | 0.78 | 1-5   | 4.18                | 0.22 | 3.17-4.74  | 0.09                         |
| Women                        | 4.17                         | 0.74 | 1-5   | 4.17                | 0.15 | 3.47-4.57  | 0.07                         |

**Table A4. Descriptives for dichotomous exposure measurements**

|                                   | INDIVIDUAL LEVEL | JOB EXPOSURE MATRIX |                                         |                            |
|-----------------------------------|------------------|---------------------|-----------------------------------------|----------------------------|
|                                   | MEASUREMENT      | Percent exposed     | Range predicted probability of exposure | Area Under the Curve (AUC) |
| <b>High Physical work demands</b> |                  |                     |                                         |                            |
| Men                               |                  | 10.8                | < 0.001 – 0.86                          | 0.85                       |
| Women                             |                  | 10.5                | < 0.001 – 0.78                          | 0.87                       |
| <b>High Quantitative demands</b>  |                  |                     |                                         |                            |
| Men                               |                  | 11.1                | < 0.001- 0.50                           | 0.62                       |
| Women                             |                  | 13.1                | < 0.001-0.53                            | 0.64                       |
| <b>High emotional demands</b>     |                  |                     |                                         |                            |
| Men                               |                  | 7.3                 | < 0.001-0.55                            | 0.69                       |
| Women                             |                  | 4.2                 | < 0.001-0.34                            | 0.64                       |
| <b>Low decision authority</b>     |                  |                     |                                         |                            |
| Men                               |                  | 5.3                 | < 0.001- 0.63                           | 0.67                       |
| Women                             |                  | 4.4                 | < 0.001-0.47                            | 0.63                       |
| <b>Job strain</b>                 |                  |                     |                                         |                            |
| Men                               |                  | 23.6                | < 0.001-0.71                            | 0.56                       |
| Women                             |                  | 12.6                | < 0.001-0.54                            | 0.58                       |
| <b>High job insecurity</b>        |                  |                     |                                         |                            |
| Men                               |                  | 12.7                | < 0.001-0.64                            | 0.59                       |
| Women                             |                  | 13.7                | < 0.001-0.53                            | 0.64                       |
| <b>Violence</b>                   |                  |                     |                                         |                            |
| Men                               |                  | 3.4                 | < 0.001 -0.85                           | 0.84                       |
| Women                             |                  | 8.0                 | < 0.001-0.81                            | 0.86                       |

**Table A5. Job groups with highest and lowest levels of exposure for men and women**

| <b>MEN</b>                   | <b>Highest level job groups, age, predicted level of exposure</b>                                                                                                                            | <b>Lowest level job groups, age, predicted level of exposure</b>                                                                                                                                                |
|------------------------------|----------------------------------------------------------------------------------------------------------------------------------------------------------------------------------------------|-----------------------------------------------------------------------------------------------------------------------------------------------------------------------------------------------------------------|
| <b>Physical work demands</b> | 711210 Bricklayers, 18, 35.4<br>816010 Industrial butcherwork (excluding poultry),18, 33.9<br>611320 Gardeners, 18, 33.1                                                                     | 4312 Statistical, Finance and Insurance clerks, 64, 9.7<br>263100, Economists, 64, 10.2<br>241310, Financial Analysts, 18, 10.4                                                                                 |
| <b>Quantitative demands</b>  | 121320, Administrative management in the public sector, 38, 3.8<br>112010, Upper Managing directors, 38, 3.6<br>133020, Information and Communications Technology Services Managers, 38, 3.6 | 831100, Locomotive Engine Drivers, 64, 2.4<br>931200, Civil Engineering Labourers, 64, 2.5<br>931330, Bricklaying Labourers, 64, 2.5                                                                            |
| <b>Emotional demands</b>     | 234300, Pedagogues, 38, 4.0<br>235700, Special-pedagoues, 38, 4.0<br>234120, Primary School Teachers, 38, 4.0                                                                                | 931330, Bricklaying Labourers, 18, 1.7<br>814 Rubber, Plastic and Paper Products Machine Operators, 18, 1.7<br>816010 Industrial butcherwork (excluding poultry), 18, 1.9                                       |
| <b>Decision authority</b>    | 112010, Upper Managing directors, 64, 4.7<br>134500, Education Managers, 64,4.7<br>132300, Construction Managers, 64,4.6                                                                     | 831100, Locomotive Engine Drivers, 18, 3.0<br>441210, Mail Carriers, 18, 3.2<br>816010, Industrial butcherwork (excluding poultry),, 18, 3.2                                                                    |
| <b>WOMEN</b>                 | <b>Highest level job groups, age, predicted level of exposure</b>                                                                                                                            | <b>Lowest level job groups, age, predicted level of exposure</b>                                                                                                                                                |
| <b>Physical work demands</b> | 8160 Food and Related Products Machine Operators, 18, 35.3<br>814220 Plastic Products Machine Operators,18, 31.2<br>6113 Gardeners; Horticultural and Nursery Growers, 18, 30.9              | 251120, IT-systems designers and business process analytics, 64, 9.7<br>251220, consultants and programmers in software development, 64, 9.9<br>261900, Legal professionals not elsewhere classified, 64, 10.1  |
| <b>Quantitative demands</b>  | 142010 Retail Trade Managers, 37, 3.6<br>134500 Education Managers, 37, 3.5<br>2611 Lawyers, 37, 3.5                                                                                         | 531110, Child Care Workers, 64, 2.0<br>422600, Receptionists (general), 64, 2.2<br>422300, Telephone Switchboard Operators, 64, 2.3                                                                             |
| <b>Emotional demands</b>     | 2357 Special-pedagoues, 54, 4.3<br>222200 Midwifery Professionals, 54, 4.3<br>235720 Special-pedagoues, activation etc., 54, 4.3                                                             | 821900, Assemblers not elsewhere classified, 64, 1.7<br>251220, consultants and programmers in software development, 64, 2.0<br>818990,stationary plant and machine operators not elsewhere classified, 64, 2.0 |
| <b>Decision authority</b>    | 2265 Dieticians and Nutritionists, 64, 4.6<br>231010 University and Higher Education Teachers and Researchers, 64,4.6<br>121100, Finance Managers, 64,4.6                                    | 541, Protective Services Workers, 18, 3.4<br>441210, Mail Carriers, 18, 3.4<br>8160, Food and Related Products Machine Operators, 18, 3.5                                                                       |

Note that all estimates for the exposures are job group specific but in some cases round off to similar estimates.



**Table A6. Job groups with highest and lowest levels of heterogeneity for men and women**

|                              | <b>MEN</b>                                                                                                                                                 |                                                                                                                                                                   | <b>WOMEN</b>                                                                                                                                                          |                                                                                                                                                                     |
|------------------------------|------------------------------------------------------------------------------------------------------------------------------------------------------------|-------------------------------------------------------------------------------------------------------------------------------------------------------------------|-----------------------------------------------------------------------------------------------------------------------------------------------------------------------|---------------------------------------------------------------------------------------------------------------------------------------------------------------------|
|                              | <b>Most heterogeneous job groups, SD</b>                                                                                                                   | <b>Least heterogeneous job groups, SD</b>                                                                                                                         | <b>Most heterogeneous job group, SD</b>                                                                                                                               | <b>Least heterogeneous job group, SD</b>                                                                                                                            |
| <b>Physical work demands</b> | 962900 Elementary Workers Not Elsewhere Classified, 13.2<br>9621 Messengers, Package Deliverers And Luggage Porters, 11.4<br>524 Other Sales Workers, 11.0 | 311 Physical And Engineering Science Technicians, 0.7<br>26110 Lawyers, 0.8<br>833260 Truck Drivers With Dangerous Goods, 1.0                                     | 432200 Production Clerks, 10.9<br>911260 Serviceworkers Different Sectors (Cleaning), 8.7<br>532190 Other Care Work In Institutions And Hospitals, 8.7                | 243 Sales, Marketing And Public Relations Professionals , 0.8<br>122100 Sales And Marketing Managers, 1.0<br>422200 Contact Centre Information Clerks, 1.1          |
| <b>Quantitative demands</b>  | 422100, Travel Consultants And Clerks, 1.3<br>931230 Cabling Labourers, 1.2<br>833260 Truck Drivers With Dangerous Goods, 1.1                              | 311 Physical And Engineering Science Technicians, 0 (all observations are the same)<br>441220 Sorting Clerks, 0.2<br>721300 Sheet Metal Workers 0.2               | 300000 Technicians And Associate Professionals, 1.2<br>334320 Interior Designers And Decorators, 1.1<br>341 Legal, Social And Religious Associate Professionals, 1.0  | 233020 Secondary Education Teachers, 0.23<br>333900 Business Services Agents Not Elsewhere Classified, 0.3<br>8160 Food And Related Products Machine Operators, 0.3 |
| <b>Emotional demands</b>     | 933 Transport And Storage Labourers, 1.7<br>524 Other Sales Workers, 1.5<br>9621 Messengers, Package Deliverers And Luggage Porters, 1.5                   | 26110 Lawyers, 0.3<br>931330 Bricklaying Labourers, 0.3<br>2310 University And Higher Education Teachers, 0.4                                                     | 9312 Civil Engineering Labourers, 1.8<br>815 Textile, Fur And Leather Products Machine Operators, 1.7<br>932900 Manufacturing Labourers Not Elsewhere Classified, 1.7 | 234110, Education At Basic Level, Young And Adults 0.2<br>233020 Secondary Education Teachers, 0.3<br>235400 Other Music Teachers, 0.3                              |
| <b>Decision authority</b>    | 833260, Truck Drivers With Dangerous Goods, 1.4<br>962900, Elementary Workers Not Elsewhere Classified 1.3<br>933 Transport And Storage Labourers, 1.3     | 311 Physical And Engineering Science Technicians, 0 (all observations are the same)<br>532 Personal Care Workers In Health Services, 0.3<br>611320 Gardeners, 0.3 | 962 Other Elementary Workers, 2.1<br>932100 Hand Packers, 1.3<br>8160 Food And Related Products Machine Operators, 1.3                                                | 611390 Gardeners Not Elsewhere Specified, 0.2<br>4312 Statistical, Finance And Insurance Clerks, 0.3<br>524600 Food Service Counter Attendants, 0.3                 |
